# Supplementary material for: A Metabolomic Study of the Variability of the Chemical Composition of Commonly Consumed Coffee Brews
Source: MDPI journal article supplement (doi:10.3390/metabo9010017), 2019-01-18
Supplement: s1 [file s1]

## Online supplementary information

### A metabolomic study of the variability of chemical composition of commonly consumed coffee brews

Joseph A Rothwell<sup>1,§</sup>, Erikka Loftfield<sup>2,§</sup>, Neal Freedman<sup>2</sup>, Callie Kambanis<sup>2</sup>, Augustin Scalbert<sup>1,\*</sup>, Rashmi Sinha<sup>2</sup>

<sup>1</sup>International Agency for Research on Cancer (IARC), Nutrition and Metabolism Section, Biomarkers Group, 150 Cours Albert Thomas, F-69372 Lyon Cedex 08, France

<sup>2</sup>National Cancer Institute, 9609 Medical Center Drive, Bethesda MD 20892, USA

## Online Supplementary Information

### Table of Content

#### Tables

**Table S1:** Summary of mass spectral data supporting peak annotations in coffee brews.

**Table S2.** Brewed or purchased coffee samples and their characteristics.

**Table S3.** Coefficients of variation for the coffee compounds identified or tentatively identified.

#### Figures

**Figure S1.** PC-PR2 analysis of of metabolomic data from the coffee brew samples, Principal components explaining >80% of the variability were selected.

**Figure S2.** Boxplots showing means of sums of total intensities of mass spectrometry signals (n = 3670) for each type of coffee brews.

**Figure S3.** Principal component analysis of constituent profiles of the 18 annotated coffee compounds measured in 76 coffee brew samples. Scores on PC2 and PC3 are shown. (A) Color-coded according to type of coffee brew. (B) Color-coded according to decaffeination. (C) Loading plots.

**Figure S4.** T-tests comparing different groups of coffee brew samples. Dark line indicates the limit for significant difference after Bonferroni correction. Comparison of dark roasted brews with medium roasted brews, decaffeinated and caffeinated coffee brew samples, coffee brews prepared with Arabica beans and blends of Arabica and Robusta beans; instant coffees to all other coffee brew samples.

**Figure S5.** Heatmap showing correlations between annotated coffee compounds.

#### Supplementary spreadsheet (see separate Excel File)

**Supplementary Spreadsheet:** Chromatograms and spectra supporting annotation of compounds.

**Table S1:** Summary of mass spectral data supporting peak annotations in coffee brews.

| Assigned identity 1                       | Formula       | Observed m/z | Ion                | Mass difference (delta ppm) | Retention time (min) | Annotation level <sup>1</sup> |
|-------------------------------------------|---------------|--------------|--------------------|-----------------------------|----------------------|-------------------------------|
| 1-(2-Furanyl)-1,2-butanedione *           | C8 H8 O3      | 153.0552     | [M+H] <sup>+</sup> | 0.37                        | 3.11                 | 4                             |
| Unknown                                   |               | 335.2223     | [M+H] <sup>+</sup> |                             | 5.64                 | 5                             |
| Unknown                                   |               | 335.2223     | [M+H] <sup>+</sup> |                             | 5.49                 | 5                             |
| 3,4-Dicaffeoylquinic acid lactone *       | C25 H22 O11   | 499.1241     | [M+H] <sup>+</sup> | 15.03                       | 3.2                  | 4                             |
| Unknown                                   |               | 110.0607     | [M+H] <sup>+</sup> |                             | 2.51                 | 5                             |
| Unknown                                   |               | 110.0607     | [M+H] <sup>+</sup> |                             | 3.42                 | 5                             |
| Unknown                                   |               | 101.0603     | [M+H] <sup>+</sup> |                             | 1.97                 | 5                             |
| Unknown                                   |               | 125.0716     | [M+H] <sup>+</sup> |                             | 2.23                 | 5                             |
| Unknown                                   |               | 125.0716     | [M+H] <sup>+</sup> |                             | 2.32                 | 5                             |
| Unknown                                   |               | 280.1550     | [M+H] <sup>+</sup> |                             | 2.59                 | 5                             |
| Unknown                                   |               | 103.0396     | [M+H] <sup>+</sup> |                             | 2.12                 | 5                             |
| 3,4-Dimethyl-1,2-cyclopentanedione *      | C7 H10 O2     | 127.0760     | [M+H] <sup>+</sup> | 8.09                        | 3.03                 | 4                             |
| 3,5-Dicaffeoylquinic acid                 | C25 H24 O12   | 517.1347     | [M+H] <sup>+</sup> | 0.63                        | 3.85                 | 1                             |
| 3-Caffeoylquinic acid                     | C16 H18 O9    | 355.1030     | [M+H] <sup>+</sup> | 0.62                        | 2.94                 | 1                             |
| 5-Caffeoylquinic acid                     | C16 H18 O9    | 355.1030     | [M+H] <sup>+</sup> | 0.90                        | 2.46                 | 1                             |
| 5-Hydroxymethylfurfural *                 | C6 H6 O3      | 127.0396     | [M+H] <sup>+</sup> | 6.30                        | 2.09                 | 4                             |
| alpha-Furyl methyl diketone isomer (i) *  | C7 H6 O3      | 139.0396     | [M+H] <sup>+</sup> | 15.90                       | 1.86                 | 4                             |
| alpha-Furyl methyl diketone isomer (ii) * | C7 H6 O3      | 139.0396     | [M+H] <sup>+</sup> | 15.90                       | 2.13                 | 4                             |
| Atractyligenin *                          | C19 H28 O4    | 321.2067     | [M+H] <sup>+</sup> | 0.75                        | 5.37                 | 4                             |
| Cafamarine                                | C26 H36 O10   | 509.2387     | [M+H] <sup>+</sup> | 0.50                        | 4.05                 | 3                             |
| Unknown                                   |               | 371.0979     | [M+H] <sup>+</sup> |                             | 2.94                 | 5                             |
| Unknown                                   |               | 371.0979     | [M+H] <sup>+</sup> |                             | 2.46                 | 5                             |
| Unknown                                   |               | 351.1081     | [M+H] <sup>+</sup> |                             | 3.83                 | 5                             |
| Unknown                                   |               | 165.0552     | [M+H] <sup>+</sup> |                             | 3.02                 | 5                             |
| Unknown                                   |               | 125.0603     | [M+H] <sup>+</sup> |                             | 3.35                 | 5                             |
| Cafestol *                                | C20 H28 O3    | 317.2117     | [M+H] <sup>+</sup> | 2.39                        | 5.49                 | 4                             |
| Caffeoylquinic acid isomer (i) *          | C16 H18 O9    | 355.1030     | [M+H] <sup>+</sup> | 0.62                        | 3.01                 | 4                             |
| Unknown                                   |               | 87.0447      | [M+H] <sup>+</sup> |                             | 2.09                 | 5                             |
| Caffeoylquinic acid isomer (ii) *         | C16 H18 O9    | 355.1030     | [M+H] <sup>+</sup> | 1.46                        | 2.8                  | 4                             |
| Caffeoylquinic acid isomer (iii)*         | C16 H18 O9    | 355.1030     | [M+H] <sup>+</sup> | 0.90                        | 2.21                 | 4                             |
| Unknown                                   |               | 181.0502     | [M+H] <sup>+</sup> |                             | 2.42                 | 5                             |
| Caffeoylquinic acid lactone isomer (i)*   | C16 H16 O8    | 337.0924     | [M+H] <sup>+</sup> | 2.03                        | 3.5                  | 4                             |
| Caffeoylquinic acid lactone isomer (ii)*  | C16 H16 O8    | 337.0924     | [M+H] <sup>+</sup> | 1.44                        | 3.36                 | 4                             |
| Cinnamoylglycine *                        | C11 H11 N O3  | 206.0818     | [M+H] <sup>+</sup> | 5.40                        | 4.09                 | 4                             |
| Coixinden A *                             | C11 H10 O3    | 191.0709     | [M+H] <sup>+</sup> | 2.66                        | 4.45                 | 4                             |
| Coumaroylquinic acid isomer (i)*          | C16 H18 O8    | 339.1081     | [M+H] <sup>+</sup> | 1.97                        | 3.35                 | 3                             |
| Coumaroylquinic acid isomer (ii)*         | C16 H18 O8    | 339.1081     | [M+H] <sup>+</sup> | 3.65                        | 2.82                 | 4                             |
| Coumaroylquinic acid lactone *            | C16 H16 O7    | 321.0975     | [M+H] <sup>+</sup> | 4.36                        | 3.72                 | 4                             |
| Cyclo(isoleucyl-prolyl)                   | C11 H18 N2 O2 | 211.1447     | [M+H] <sup>+</sup> | 3.67                        | 3.76                 | 2                             |
| Cyclo(isophenylalanyl-prolyl)             | C14 H16 N2 O2 | 245.1291     | [M+H] <sup>+</sup> | 5.01                        | 3.94                 | 2                             |
| Cyclo(leucyl-phenylalanyl) *              | C15 H20 N2 O2 | 261.1604     | [M+H] <sup>+</sup> | 3.16                        | 4.55                 | 4                             |
| Cyclo(leucyl-prolyl)                      | C11 H18 N2 O2 | 211.1447     | [M+H] <sup>+</sup> | 3.67                        | 3.87                 | 1                             |

|                                 |               |          |                    |       |      |   |
|---------------------------------|---------------|----------|--------------------|-------|------|---|
| Cyclo(phenylalanyl-prolyl)      | C14 H16 N2 O2 | 245.1291 | [M+H] <sup>+</sup> | 3.78  | 4.05 | 1 |
| Cyclo(prolyl-prolyl) *          | C10 H14 N2 O2 | 195.1134 | [M+H] <sup>+</sup> | 5.52  | 2.6  | 4 |
| Cyclo(prolyl-valyl)             | C10 H16 N2 O2 | 197.1291 | [M+H] <sup>+</sup> | 3.17  | 3.08 | 1 |
| Unknown                         |               | 85.0654  | [M+H] <sup>+</sup> |       | 1.89 | 5 |
| Unknown                         |               | 234.1495 | [M+H] <sup>+</sup> |       | 2.59 | 5 |
| Unknown                         |               | 87.0447  | [M+H] <sup>+</sup> |       | 1.48 | 5 |
| Dicaffeoylquinic acid isomer *  | C25 H24 O12   | 517.1347 | [M+H] <sup>+</sup> | 1.21  | 4.12 | 4 |
| Unknown                         |               | 195.0658 | [M+H] <sup>+</sup> |       | 3.8  | 5 |
| Feruloylquinic acid isomer (i)  | C17 H20 O9    | 369.1186 | [M+H] <sup>+</sup> | 1.27  | 3.47 | 3 |
| Feruloylquinic acid isomer (ii) | C17 H20 O9    | 369.1186 | [M+H] <sup>+</sup> | 1.27  | 2.99 | 3 |
| Unknown                         |               | 99.0447  | [M+H] <sup>+</sup> |       | 1.86 | 5 |
| Guanosine*                      | C10 H13 N5 O5 | 284.0996 | [M+H] <sup>+</sup> | 1.52  | 1.66 | 4 |
| Methyl-2-pyrrolecarboxaldehyde  | C6 H7 N O     | 110.0607 | [M+H] <sup>+</sup> | 4.00  | 3.62 | 1 |
| N-caffeoyltryptophan            | C20 H18 N2 O5 | 367.1295 | [M+H] <sup>+</sup> | 1.99  | 4.48 | 2 |
| N-p-Coumaroyltryptophan         | C20 H18 N2 O4 | 351.1346 | [M+H] <sup>+</sup> | 2.41  | 4.71 | 2 |
| Unknown                         |               | 149.0451 | [M+H] <sup>+</sup> |       | 1.42 | 5 |
| Paraxanthine                    | C7 H8 N4 O2   | 181.0726 | [M+H] <sup>+</sup> | 10.41 | 2.69 | 1 |
| Sotolone *                      | C6 H8 O3      | 129.0552 | [M+H] <sup>+</sup> | 1.22  | 2.72 | 4 |
| Theobromine                     | C7 H8 N4 O2   | 181.0726 | [M+H] <sup>+</sup> | 3.75  | 2.37 | 1 |
| Unknown                         |               | 193.0502 | [M+H] <sup>+</sup> |       | 3.74 | 5 |
| Theophylline                    | C7 H8 N4 O2   | 181.0726 | [M+H] <sup>+</sup> | 4.30  | 2.81 | 1 |
| Unknown                         |               | 127.0396 | [M+H] <sup>+</sup> |       | 2.6  | 5 |

<sup>1</sup>Confidence level for identification: see Materials and Methods.

\* Hypothetical annotations.

**Table S2.** Brewed or purchased coffee samples and their characteristics.

| Coffee brand and brew method <sup>1</sup> | Caffeine      | Bean type | Roast  | Place of purchase or preparation |
|-------------------------------------------|---------------|-----------|--------|----------------------------------|
| <b>Brand 1 (n = 2)</b>                    |               |           |        |                                  |
| Boiled                                    | Caffeinated   | Arabica   | Dark   | Home                             |
| <b>Brand 2 (n = 4)</b>                    |               |           |        |                                  |
| Cold Brew                                 | Caffeinated   | Blend     | Medium | Laboratory                       |
| Filter                                    | Caffeinated   | Blend     | Medium | Laboratory                       |
| French Press                              | Caffeinated   | Blend     | Medium | Laboratory                       |
| Percolated                                | Caffeinated   | Blend     | Medium | Laboratory                       |
| <b>Caf  or restaurant 1 (n = 9)</b>       |               |           |        |                                  |
| Cold Brew                                 | Caffeinated   | Arabica   | Medium | Laboratory                       |
| Espresso                                  | Caffeinated   | Arabica   | Dark   | Restaurant                       |
| Espresso                                  | Decaffeinated | Arabica   | Dark   | Restaurant                       |
| Filter                                    | Caffeinated   | Arabica   | Medium | Restaurant                       |
| Filter                                    | Caffeinated   | Arabica   | Medium | Laboratory                       |
| Filter                                    | Decaffeinated | Arabica   | Medium | Laboratory                       |
| Filter                                    | Decaffeinated | Arabica   | Medium | Restaurant                       |
| French Press                              | Caffeinated   | Arabica   | Medium | Laboratory                       |
| Percolated                                | Caffeinated   | Arabica   | Medium | Laboratory                       |
| <b>Brand 3 (n = 1)</b>                    |               |           |        |                                  |
| Filter                                    | Caffeinated   | Arabica   | Dark   | Laboratory                       |
| <b>Brand 4 (n = 12)</b>                   |               |           |        |                                  |
| Cold Brew                                 | Caffeinated   | Blend     | Medium | Laboratory                       |
| Filter                                    | Caffeinated   | Blend     | Dark   | Laboratory                       |
| Filter                                    | Caffeinated   | Blend     | Light  | Laboratory                       |
| Filter                                    | Caffeinated   | Blend     | Medium | Laboratory                       |
| Filter                                    | Decaffeinated | Blend     | Medium | Laboratory                       |
| French Press                              | Caffeinated   | Blend     | Medium | Laboratory                       |
| Instant                                   | Caffeinated   | Blend     | Medium | Laboratory                       |
| Instant                                   | Decaffeinated | Blend     | Medium | Laboratory                       |
| K-Cup                                     | Caffeinated   | Arabica   | Medium | Laboratory                       |
| K-Cup                                     | Decaffeinated | Arabica   | Medium | Laboratory                       |
| Percolated                                | Caffeinated   | Blend     | Medium | Laboratory                       |
| Filter                                    | Caffeinated   | Blend     | Dark   | Laboratory                       |
| <b>Brand 5 (n = 8)</b>                    |               |           |        |                                  |
| Cold Brew                                 | Caffeinated   | Arabica   | Medium | Laboratory                       |
| Filter                                    | Caffeinated   | Arabica   | Dark   | Laboratory                       |
| Filter                                    | Caffeinated   | Arabica   | Light  | Laboratory                       |
| Filter                                    | Caffeinated   | Arabica   | Medium | Laboratory                       |
| Filter                                    | Decaffeinated | Arabica   | Medium | Laboratory                       |

|                                     |               |         |              |            |
|-------------------------------------|---------------|---------|--------------|------------|
| French Press                        | Caffeinated   | Arabica | Medium       | Laboratory |
| Percolated                          | Caffeinated   | Arabica | Medium       | Laboratory |
| Filter                              | Decaffeinated | Arabica | Medium       | Laboratory |
| <b>Brand 6 (n = 1)</b>              |               |         |              |            |
| K-Cup                               | Caffeinated   | Arabica | Medium       | Laboratory |
| <b>Brand 7 (n = 2)</b>              |               |         |              |            |
| Instant                             | Caffeinated   | Unknown | Unknown      | Laboratory |
| Instant                             | Caffeinated   | Unknown | Unknown      | Laboratory |
| <b>Brand 8 (n = 4)</b>              |               |         |              |            |
| Cold Brew                           | Caffeinated   | Arabica | Medium       | Laboratory |
| Filter                              | Caffeinated   | Arabica | Medium       | Laboratory |
| French Press                        | Caffeinated   | Arabica | Medium       | Laboratory |
| Percolated                          | Caffeinated   | Arabica | Medium       | Laboratory |
| <b>Brand 9 (n = 1)</b>              |               |         |              |            |
| Boiled                              | Caffeinated   | Blend   | Medium       | Home       |
| <b>Brand 10 (n = 1)</b>             |               |         |              |            |
| Filter                              | Caffeinated   | Arabica | Light        | Laboratory |
| <b>Brand 11 (n = 10)</b>            |               |         |              |            |
| Cold Brew                           | Caffeinated   | Blend   | Medium       | Laboratory |
| Filter                              | Caffeinated   | Blend   | Dark         | Laboratory |
| Filter                              | Caffeinated   | Blend   | Light        | Laboratory |
| Filter                              | Caffeinated   | Blend   | Medium       | Laboratory |
| Filter                              | Decaffeinated | Blend   | Medium       | Laboratory |
| French Press                        | Caffeinated   | Blend   | Medium       | Laboratory |
| Instant                             | Caffeinated   | Blend   | Medium       | Laboratory |
| Instant                             | Decaffeinated | Blend   | Medium       | Laboratory |
| K-Cup                               | Caffeinated   | Arabica | Medium       | Laboratory |
| Percolated                          | Caffeinated   | Blend   | Medium       | Laboratory |
| <b>Caf  or restaurant 2 (n = 2)</b> |               |         |              |            |
| Filter                              | Caffeinated   | Arabica | Medium       | Restaurant |
| Filter                              | Decaffeinated | Arabica | Medium       | Restaurant |
| <b>Brand 12 (n = 1)</b>             |               |         |              |            |
| Boiled                              | Caffeinated   | Arabica | Dark         | Home       |
| <b>Brand 13 (n = 3)</b>             |               |         |              |            |
| Instant                             | Caffeinated   | Blend   | Dark         | Laboratory |
| Instant                             | Caffeinated   | Blend   | Medium-Dark  | Laboratory |
| Instant                             | Caffeinated   | Unknown | Unknown      | Laboratory |
| <b>Brand 14 (n = 3)</b>             |               |         |              |            |
| Instant                             | Caffeinated   | Blend   | Light-Medium | Laboratory |
| Instant                             | Caffeinated   | Blend   | Medium-Dark  | Laboratory |

|                                     |               |         |              |            |
|-------------------------------------|---------------|---------|--------------|------------|
| Instant                             | Decaffeinated | Blend   | Light-Medium | Laboratory |
| <b>Brand 15 (n = 3)</b>             |               |         |              |            |
| Espresso                            | Caffeinated   | Arabica | Medium       | Laboratory |
| Espresso                            | Caffeinated   | Blend   | Dark         | Laboratory |
| Espresso                            | Caffeinated   | Blend   | Medium       | Laboratory |
| <b>Caf  or restaurant 3 (n = 2)</b> |               |         |              |            |
| Espresso                            | Caffeinated   | Arabica | Dark         | Restaurant |
| Espresso                            | Decaffeinated | Arabica | Dark         | Restaurant |
| <b>Brand 16 (n = 1)</b>             |               |         |              |            |
| Filter                              | Caffeinated   | Blend   | Dark         | Laboratory |
| <b>Brand 17 (n = 1)</b>             |               |         |              |            |
| Filter                              | Caffeinated   | Arabica | Dark         | Laboratory |
| <b>Caf  or restaurant 4 (n = 6)</b> |               |         |              |            |
| Espresso                            | Caffeinated   | Arabica | Dark         | Restaurant |
| Espresso                            | Decaffeinated | Arabica | Dark         | Restaurant |
| Filter                              | Caffeinated   | Arabica | Lightn       | Laboratory |
| Filter                              | Caffeinated   | Arabica | Medium       | Restaurant |
| Filter                              | Decaffeinated | Arabica | Medium       | Restaurant |
| K-Cup                               | Decaffeinated | Arabica | Medium       | Laboratory |

<sup>1</sup> Brands 1-17: Caf   Najjar, Choc Full O Nuts, 8 O'Clock, Folgers, Green Mountain, Klassno, Lavazza, Loumidis, Marley, Maxwell, Mehmet, Nescafe, Nescafe Tasters' Choice, Nespresso, Peets, Safeway; Caf  Restaurant 1-4: Dunkin, McDonalds, Panera, Starbucks.

**Table S3.** Coefficients of variation for the coffee compounds identified or tentatively identified.

| Compound                                | Blinded QC1 | Blinded QC2 | Pooled QC |
|-----------------------------------------|-------------|-------------|-----------|
| 1-(2-Furanyl)-1,2-butanedione           | 5.3         | 3.4         | 8.3       |
| N-Methyl-2-pyrrolicarboxaldehyde        | 13.6        | 8.1         | 16.9      |
| 3,4-Dicaffeoylquinic acid lactone       |             | 6.6         | 10.8      |
| 3,4-Dimethyl-1,2-cyclopentanedione      | 11.3        | 4.7         | 8.6       |
| 3,5-Dicaffeoylquinic acid               | 24.0        | 12.9        | 14.1      |
| 3-Caffeoylquinic acid                   | 17.0        | 7.2         | 10.0      |
| 5-Caffeoylquinic acid                   | 20.7        | 6.6         | 11.3      |
| 5-Hydroxymethylfurfural                 | 3.3         | 5.9         | 15.2      |
| alpha-Furyl methyl diketone isomer (i)  | 10.8        | 4.8         | 8.5       |
| alpha-Furyl methyl diketone isomer (ii) | 8.8         | 3.3         | 8.2       |
| Atractyligenin                          | 12.3        | 5.7         | 7.5       |
| Cafamarine                              | 17.4        | 11.5        | 13.0      |
| Cafestol                                | 15.8        | 11.3        | 9.0       |
| Caffeoylquinic acid isomer (i)          | 14.3        | 7.8         | 10.8      |
| Caffeoylquinic acid isomer (ii)         | 21.6        | 8.2         | 12.3      |
| Caffeoylquinic acid isomer (iii)        | 20.5        | 7.9         | 11.7      |
| Caffeoylquinic acid lactone isomer (i)  | 10.1        | 9.0         | 9.2       |
| Caffeoylquinic acid lactone isomer (ii) | 8.6         | 5.7         | 9.3       |
| Cinnamoylglycine                        | 6.9         | 3.6         | 7.8       |
| Citramalic acid                         | 13.0        | 6.8         | 9.4       |
| Coixinden A                             | 12.8        | 12.6        | 11.2      |
| Coumaroylquinic acid isomer (i)         | 15.4        | 6.8         | 9.9       |
| Coumaroylquinic acid isomer (ii)        | 18.8        | 21.5        | 14.9      |
| Coumaroylquinic acid lactone            | 15.1        | 9.8         | 12.0      |
| Cyclo(isoleucyl-prolyl)                 | 13.5        | 3.6         | 8.0       |
| Cyclo(isophenylalanyl-prolyl)           | 9.1         | 3.3         | 8.2       |
| Cyclo(leucyl-phenylalanyl)              | 16.1        | 6.3         | 7.3       |
| Cyclo(leucyl-prolyl)                    | 9.8         | 3.5         | 10.1      |
| Cyclo(phenylalanyl-prolyl)              | 9.1         | 3.2         | 5.8       |
| Cyclo(prolyl-prolyl)                    | 7.1         | 3.0         | 5.9       |
| Cyclo(prolyl-valyl)                     | 16.2        | 6.8         | 8.7       |
| Dicaffeoylquinic acid isomer*           | 21.7        | 12.7        | 12.9      |
| Feruloylquinic acid isomer (i)          | 21.4        | 6.9         | 10.9      |
| Feruloylquinic acid isomer (ii)         | 21.2        | 4.8         | 9.6       |
| Guanosine                               | 14.1        | 7.1         | 10.9      |
| Methyl-2-pyrrolicarboxaldehyde          | 6.9         | 6.6         | 6.1       |
| N-p-Coumaroyltryptophan                 | 20.7        | 11.4        | 10.7      |
| N-Caffeoyltryptophan                    | 18.4        | 9.3         | 12.6      |
| Paraxanthine                            | 10.2        | 9.3         | 11.8      |
| Sotolone                                | 31.4        | 23.9        | 28.4      |
| Theobromine                             | 10.1        | 4.3         | 8.0       |
| Theophylline                            | 10.6        | 3.6         | 9.4       |



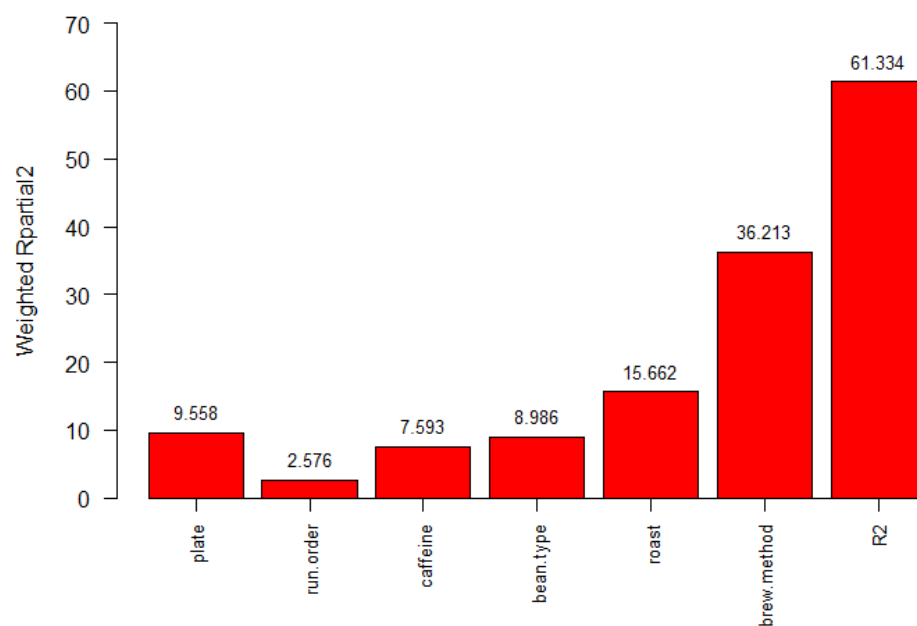

**Figure S1.** PC-PR2 analysis of of metabolomic data from the coffee brew samples, Principal components explaining >80% of the variability were selected.

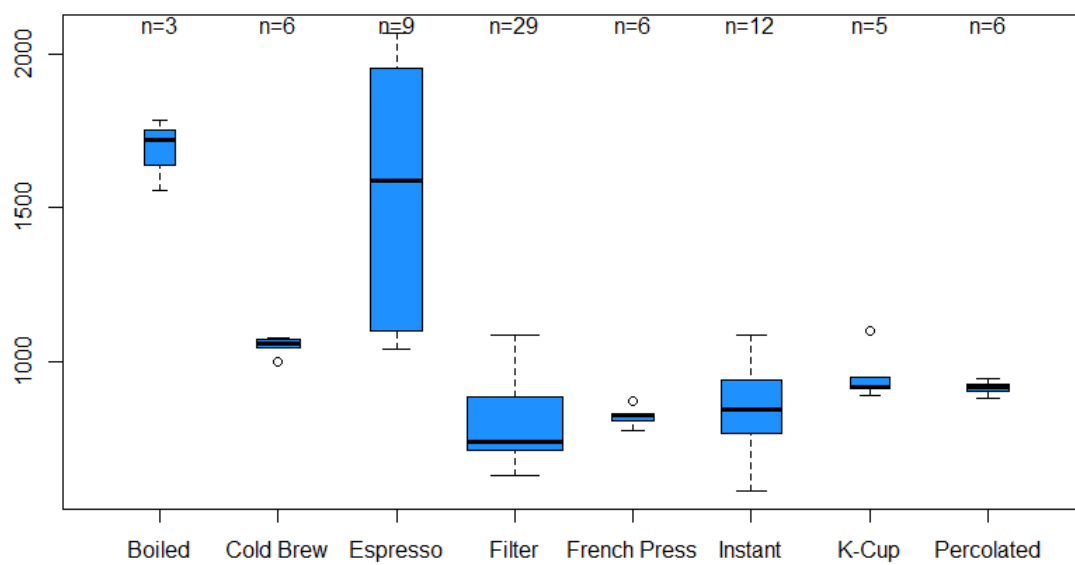

**Figure S2.** Boxplots showing means of sums of total intensities of mass spectrometry signals (n = 3670) for each type of coffee brews.

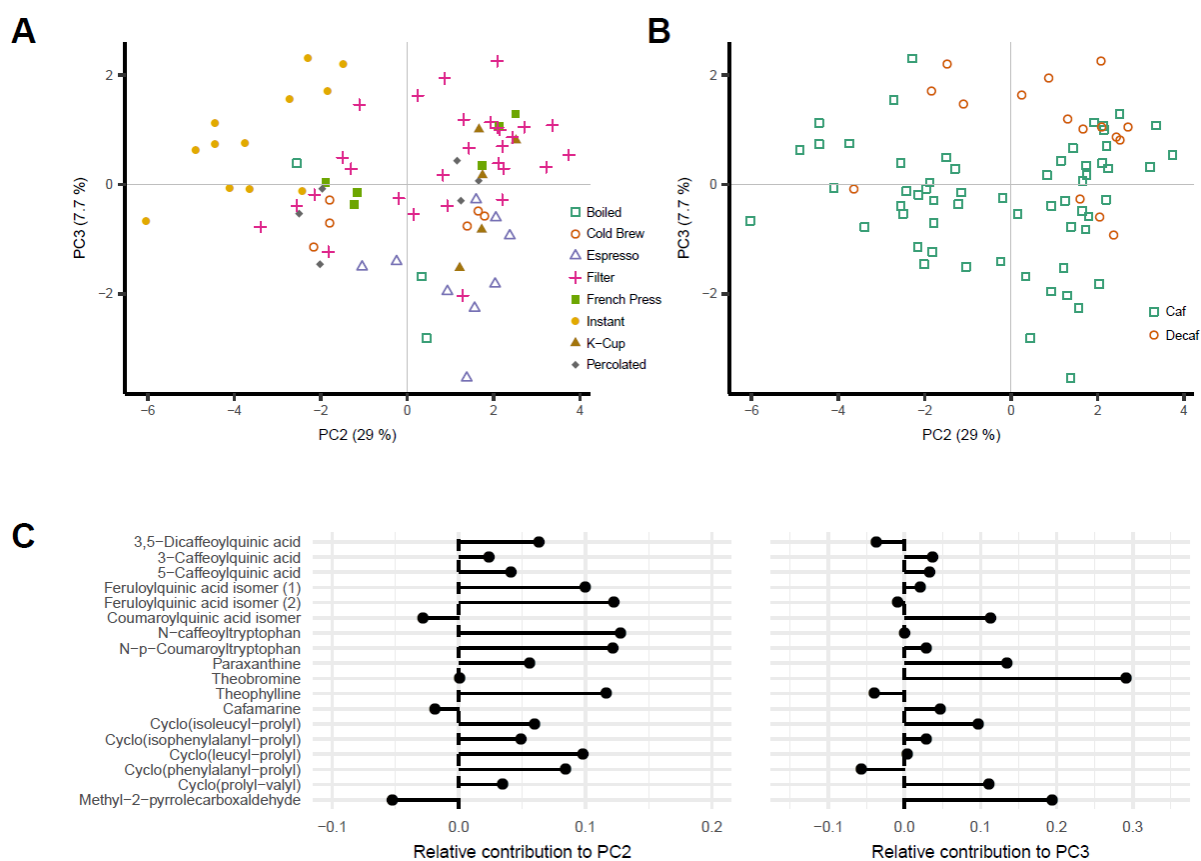

**Figure S3.** Principal component analysis of constituent profiles of the 18 annotated coffee compounds measured in 76 coffee brew samples. Scores on PC2 and PC3 are shown. (A) Color-coded according to type of coffee brew. (B) Color-coded according to decaffeination. (C) Loading plots.

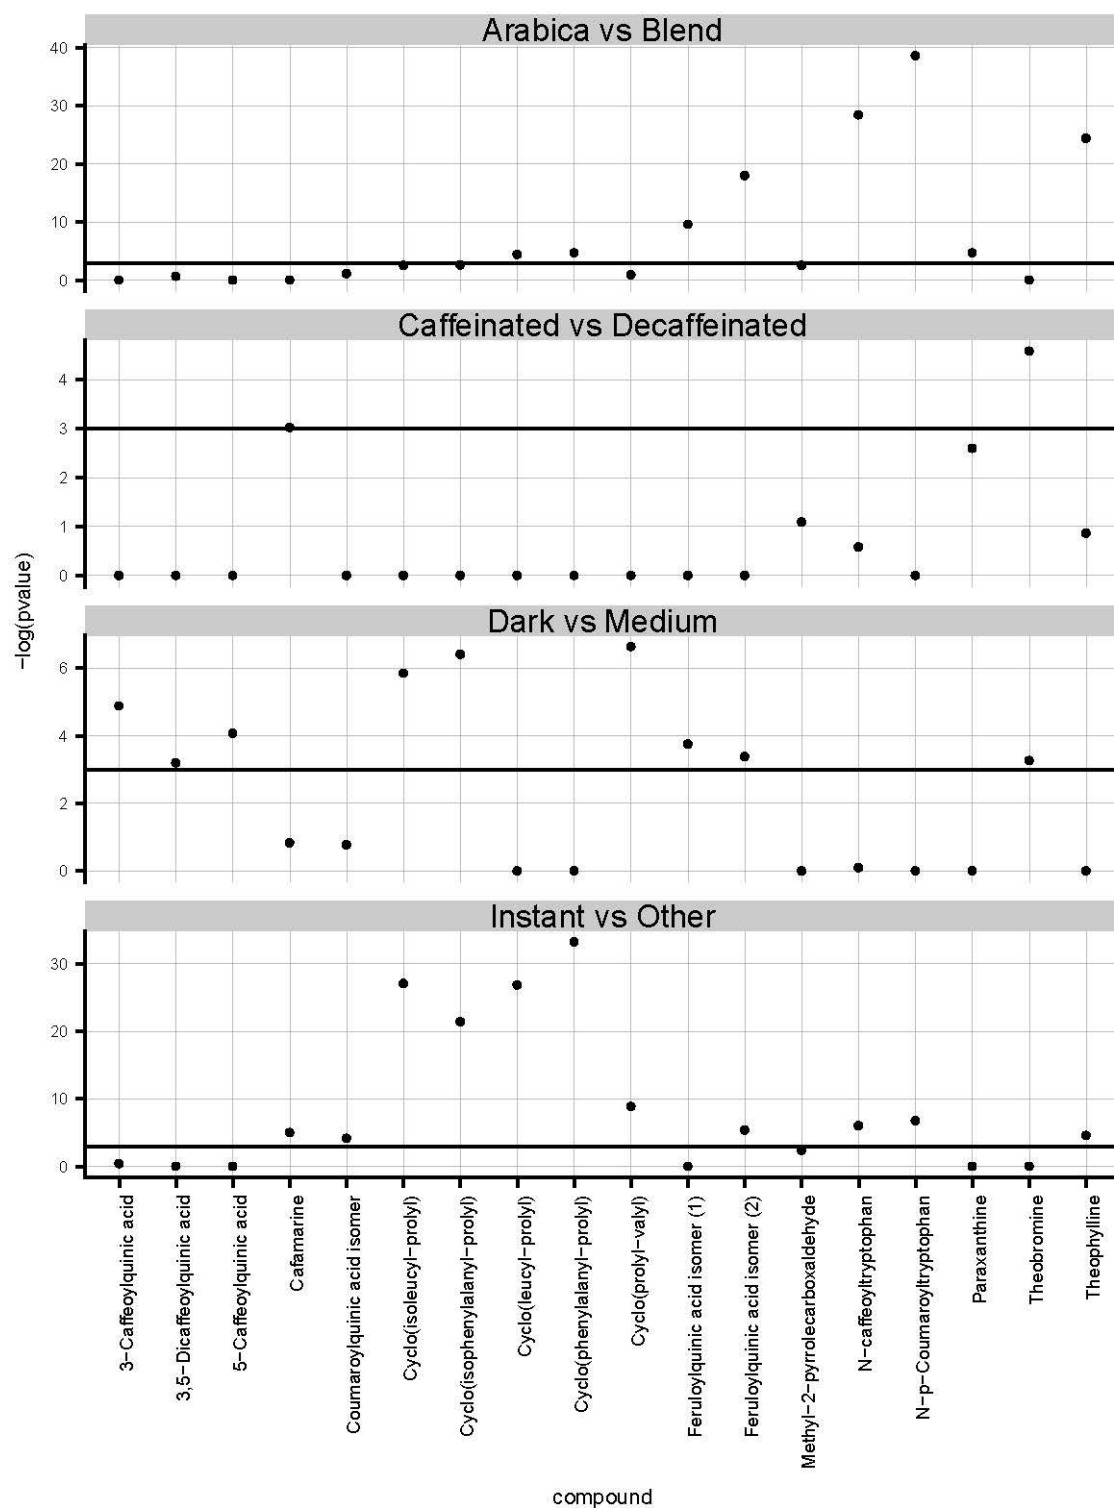

**Figure S4.** T-tests comparing different groups of coffee brew samples. Dark line indicates the limit for significant difference after Bonferroni correction. Comparison of dark roasted brews with medium roasted brews, decaffeinated and caffeinated coffee brew samples, coffee brews prepared with Arabica beans and blends of Arabica and Robusta beans; instant coffees to all other coffee brew samples.

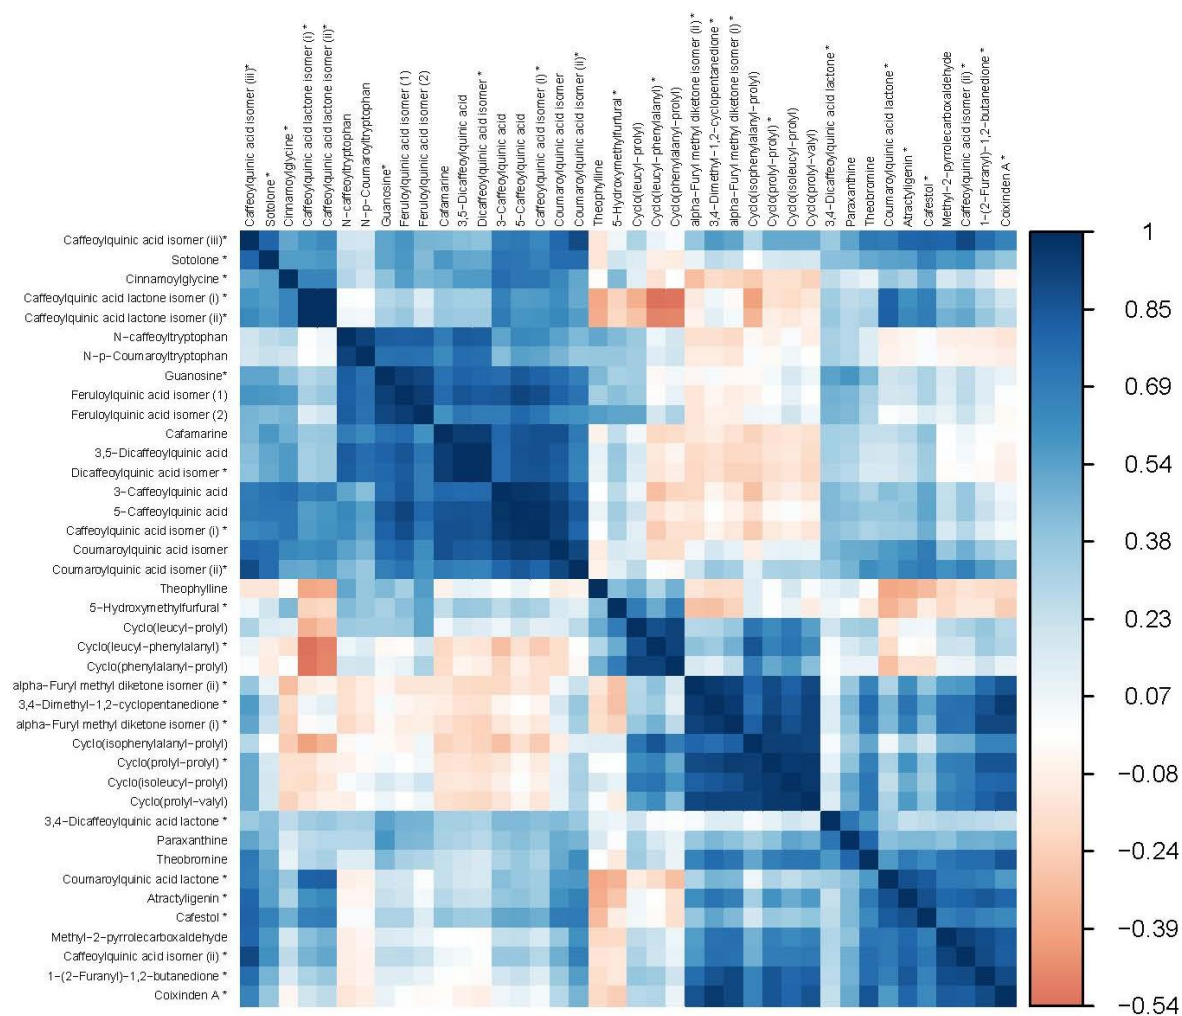

**Figure S5.** Heatmap showing correlations between annotated coffee compounds. See supplementary table 1 for details on annotations.
